# Supplementary material for: Morphology-directed synthesis of Co3O4nanotubes based on modified Kirkendall effect and its application in CH4combustion
Source: Royal Society of Chemistry journal article supplement (doi:10.1039/c1cc15976c), 2011-12-03
Supplement: c1cc15976c.pdf [file c1cc15976c.pdf]

## Supplementary Information for

# Morphology-directed synthesis of $\text{Co}_3\text{O}_4$ nanotubes based on modified Kirkendall effect and its application in $\text{CH}_4$ combustion

Zhaoyang Fei <sup>1</sup>, Shengchao He <sup>1</sup>, Lei Li <sup>1</sup>, Weijie Ji <sup>1,\*</sup>, and Chak-Tong Au <sup>2,\*</sup>

<sup>1</sup> *Key Laboratory of Mesoscopic Chemistry, MOE, School of Chemistry and Chemical Engineering, Nanjing University, Nanjing 210093, P. R. China, E-mail:*

[jiwj@nju.edu.cn](mailto:jiwj@nju.edu.cn); Fax: +86-25-83317761

<sup>2</sup> *Department of Chemistry, Hong Kong Baptist University, Hong Kong, China, E-mail:*

[pctau@hkbu.edu.hk](mailto:pctau@hkbu.edu.hk), Fax: +852-3411-7348

## Experimental Details

### Sample preparation

In an optimized procedure,  $\text{CoCl}_2 \cdot 6\text{H}_2\text{O}$  of 2 mmol was dissolved in 100 ml deionized water, followed by the addition of 100 ml oxalic acid solution (0.1 M) under stirring. A pink precipitate was generated after 3 h. The product was dispersed into 50 ml ethanol, and an ethanol solution of NaOH (0.1 M, 50 ml) was added dropwise into the suspension under stirring. After 3 h, the product was collected using a centrifuge and washed with deionized water and ethanol. The  $\text{Co}_3\text{O}_4$  NTs were generated through calcination of the as-obtained product in air at  $350^\circ\text{C}$  or  $550^\circ\text{C}$  for 3 h, and are denoted hereinafter as  $\text{Co}_3\text{O}_4$  NTs ( $350^\circ\text{C}$ ) and  $\text{Co}_3\text{O}_4$  NTs ( $550^\circ\text{C}$ ), respectively. In the case that the pink precipitate generated in the reaction of  $\text{CoCl}_2$  with oxalic acid was calcined in air at  $350^\circ\text{C}$ , the product was  $\text{Co}_3\text{O}_4$  nanorods (NRs). The  $\text{Co}_3\text{O}_4$  NPs were prepared by a low-temperature urea combustion process. First, a 50 ml  $\text{Co}(\text{NO}_3)_2$  (0.096 mol) solution was stirred at  $50^\circ\text{C}$  for 1 h. After the addition of urea (0.192 mol), the solution was heated at  $80^\circ\text{C}$  (12 h) for slow evaporation of water. The resulting powder was ground in a grinder and calcined in air at  $400^\circ\text{C}$  for 6 h.

### Characterization

$\text{N}_2$  adsorption-desorption measurement was performed on an ASAP-2020 instrument at 77 K. XRD analysis was conducted on a Philips X'Pert MPD Pro

X-ray diffractometer, with Cu-K $\alpha$  radiation ( $\lambda = 0.1541$  nm) in the  $2\theta$  range of 10–80°. Scanning electron microscopy (SEM) images were collected on a S-4800 scanning microscope whereas TEM images were taken on a JEOL JEM-1010/2010 transmission electron microscope operated at 200 kV. Thermogravimetric analysis (TGA) of the  $\beta$ -Co(OH) $_2$  and CoC $_2$ O $_4$ ·2H $_2$ O precursors was carried out on a TG-DTA/DSC apparatus (STA449C, Germany) with the sample kept in flowing Ar and heated from 50 to 600°C (heating rate: 10°C/min). H $_2$ -TPR measurement was performed in a U-shape quartz reactor with the sample (50 mg) kept under a H $_2$ -Ar mixture (v/v=5/95). Before switching the gas feed to H $_2$ -Ar stream, the sample was pretreated in Ar stream at 120°C for 1 h, and then cooled to room temperature. The TPR profile was recorded with temperature programming from 50 to 500°C at a rate of 10°C/min. H $_2$  consumption was monitored by a thermo-conductive detector. O $_2$ -TPD was carried out in the U-shape quartz reactor. Catalyst of 400 mg was pretreated in Ar steam at 300°C for 1h, then oxygen adsorption was conducted in pure O $_2$  at 200°C for 1 h. After cooling to room temperature, the system was purged with Ar (60 ml/min) for 1 h. After that, the temperature was raised to 700°C at a rate of 10°C/min in Ar flow (60 ml/min), and the effluent gases from the reactor were analyzed with a thermo-conductive detector.

### **Catalytic reaction**

Catalytic activity of different materials was evaluated in a continuous-flow

quartz reactor (200 mg catalyst) at atmospheric pressure. The feed is 2% CH<sub>4</sub> and balanced air. The reaction was operated in the 150-400°C range at a GHSV of 6000 ml/g<sub>cat</sub>·h. Before reaction, the catalyst was pretreated in air (40 ml/min) at 200°C for 1 h. The outlet products were analysed by on-line gas chromatography (GC-122). In each case, complete oxidation of CH<sub>4</sub> could be confirmed since CO<sub>2</sub> was the only carbon-containing product detected, and the calculated carbon balance further confirmed that.

**Table S1 Physicochemical properties of various Co<sub>3</sub>O<sub>4</sub> nanostructures**

| <i>Catalyst</i>                                 | <i>S<sub>BET</sub> (m<sup>2</sup>/g)</i> |              | <i>H<sub>2</sub>-TPR peak temp. (°C)</i> |                    | <i>O<sub>2</sub>-TPD peak temp. (°C)</i> | <i>R<sub>A</sub><sup>b</sup></i><br>(mmol <sub>CH<sub>4</sub></sub> m <sup>-2</sup><br>h <sup>-1</sup> ) |
|-------------------------------------------------|------------------------------------------|--------------|------------------------------------------|--------------------|------------------------------------------|----------------------------------------------------------------------------------------------------------|
|                                                 | <i>Fresh</i>                             | <i>After</i> | <i>First peak</i>                        | <i>Second peak</i> | <i>Low-/high-temp.</i>                   |                                                                                                          |
|                                                 | <i>Reaction<sup>a</sup></i>              |              |                                          |                    |                                          |                                                                                                          |
| <i>Co<sub>3</sub>O<sub>4</sub> NTs (350 °C)</i> | 44.7                                     | 43.5         | 251                                      | 383                | 189/393                                  | 0.22                                                                                                     |
| <i>Co<sub>3</sub>O<sub>4</sub> NTs (550 °C)</i> | 40.5                                     | 39.8         | 282                                      | 388                | 195/393                                  | 0.23                                                                                                     |
| <i>Co<sub>3</sub>O<sub>4</sub> NRs (350 °C)</i> | 36.9                                     | 35.7         | 324                                      | 476                | 203/415                                  | 0.16                                                                                                     |
| <i>Co<sub>3</sub>O<sub>4</sub> NPs</i>          | 47.6                                     | 45.5         | 371                                      | 545                | 264/450                                  | 0.04                                                                                                     |

<sup>a</sup> After 30 h time on stream

<sup>b</sup> Specific activity per surface area at 300 °C.

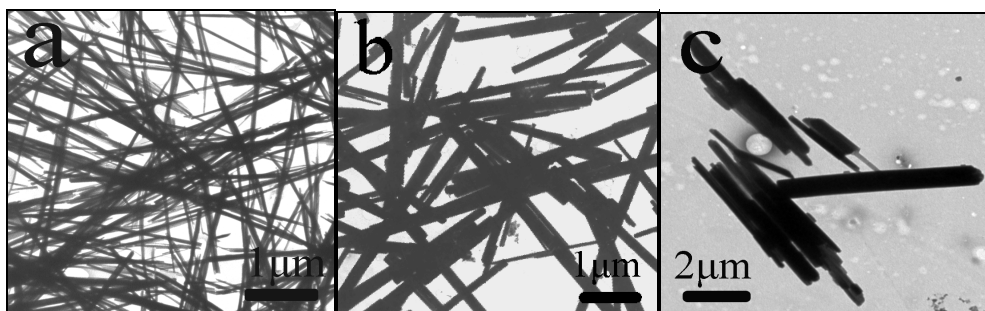

**Fig. S1** TEM images of  $\text{CoC}_2\text{O}_4$  NRs generated at different concentration of oxalic acid solution: (a) 0.01M, (b) 0.1 M, and (c) 0.5 M.

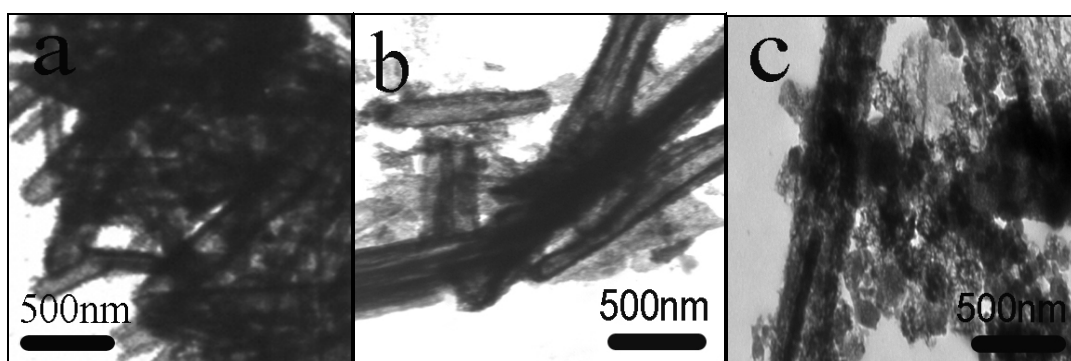

**Fig. S2** TEM images of  $\text{Co}(\text{OH})_2$  NTs obtained at different concentration of NaOH solution: (a) 0.1 M, (b) 0.25 M, and (c) 0.5 M.

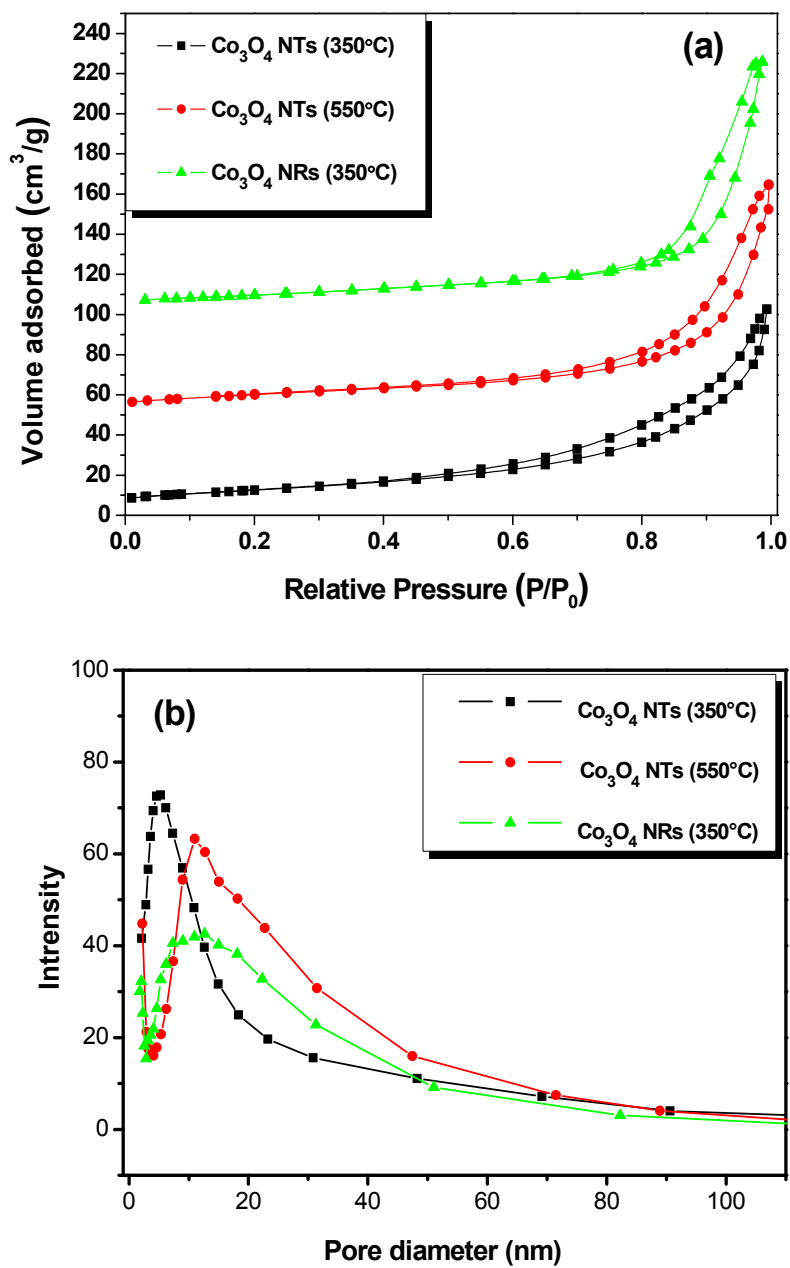

**Fig. S3** (a) Nitrogen adsorption-desorption isotherms and (b) pore size distribution of  $\text{Co}_3\text{O}_4$  nanostructures.



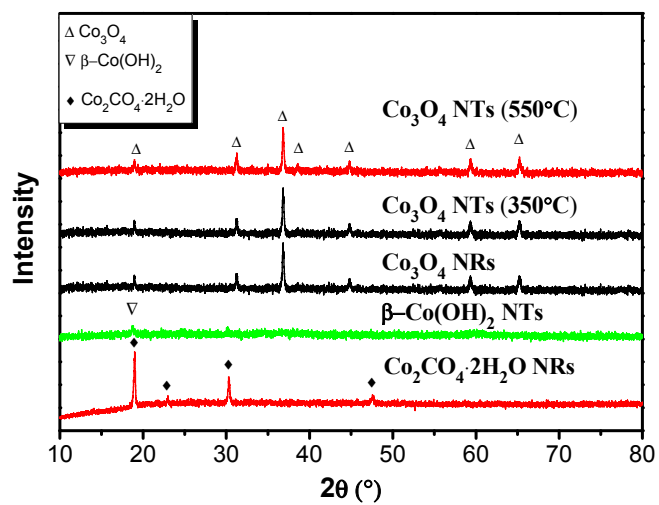

**Fig. S4** XRD patterns of as-prepared  $\text{Co}_3\text{O}_4$  NTs, NRs and related precursors.

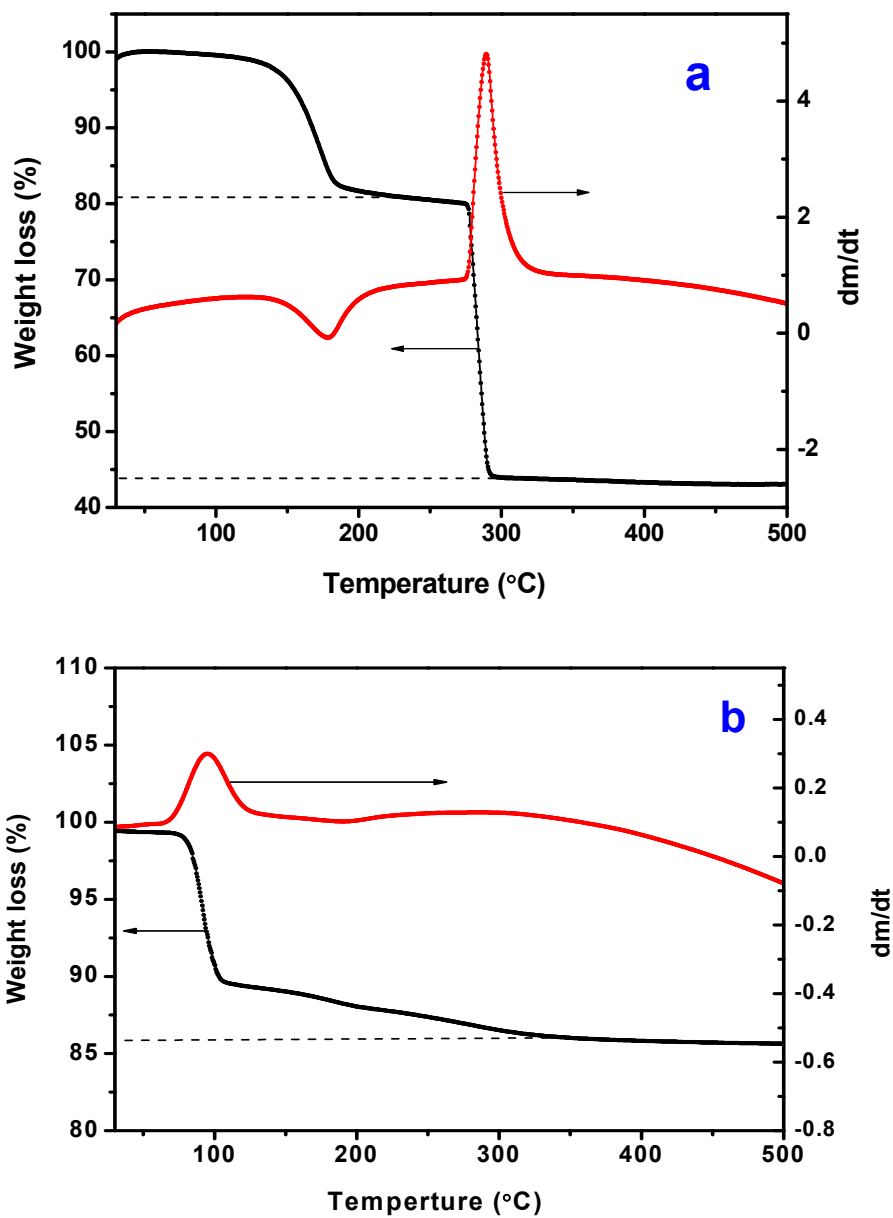

**Fig. S5** TGA profiles of (a)  $\text{CoC}_2\text{O}_4 \cdot 2\text{H}_2\text{O}$  NRs and (b)  $\beta\text{-Co(OH)}_2$ .

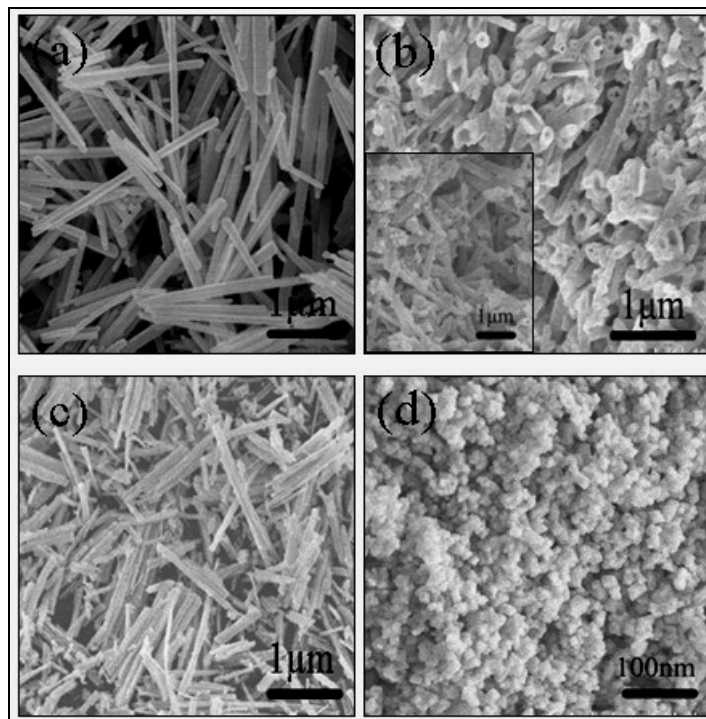

**Fig. S6** SEM images of (a)  $\text{CoC}_2\text{O}_4 \cdot 2\text{H}_2\text{O}$  NRs, (b)  $\text{Co}_3\text{O}_4$  NTs(350°C) [the inset is  $\text{Co}_3\text{O}_4$  NTs(550°C)], (c)  $\text{Co}_3\text{O}_4$  NRs, and (d)  $\text{Co}_3\text{O}_4$  NPs.

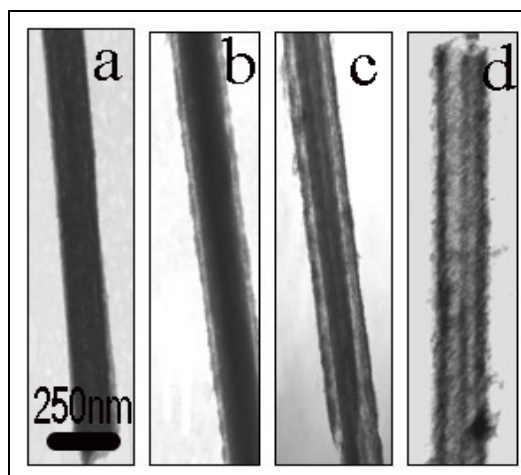

**Fig. S7** TEM images of the evolution of  $\text{Co}(\text{OH})_2$  NTs at different reaction time: (a) 10 min, (b) 30 min, (c) 90 min, and (d) 150 min.

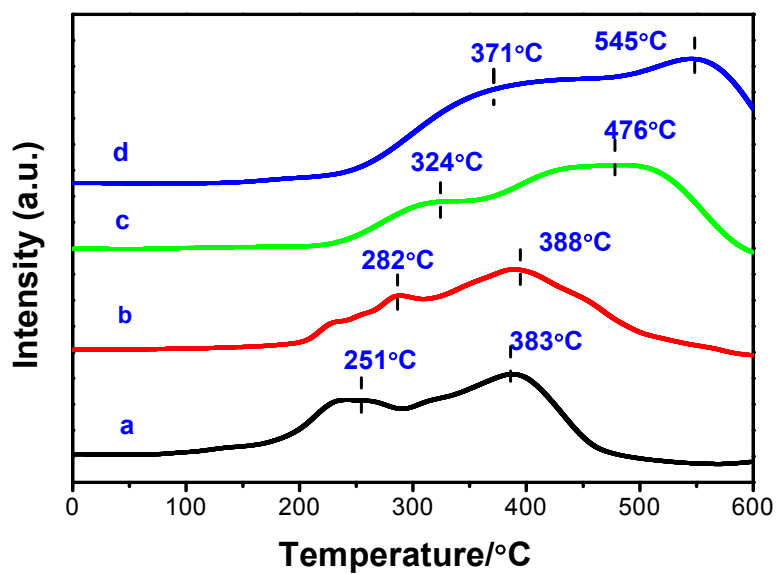

**Fig. S8** H<sub>2</sub>-TPR profiles of (a) Co<sub>3</sub>O<sub>4</sub> NTs(350°C), (b) Co<sub>3</sub>O<sub>4</sub> NTs(550°C), (c) Co<sub>3</sub>O<sub>4</sub> NRs, and (d) Co<sub>3</sub>O<sub>4</sub> NPs.

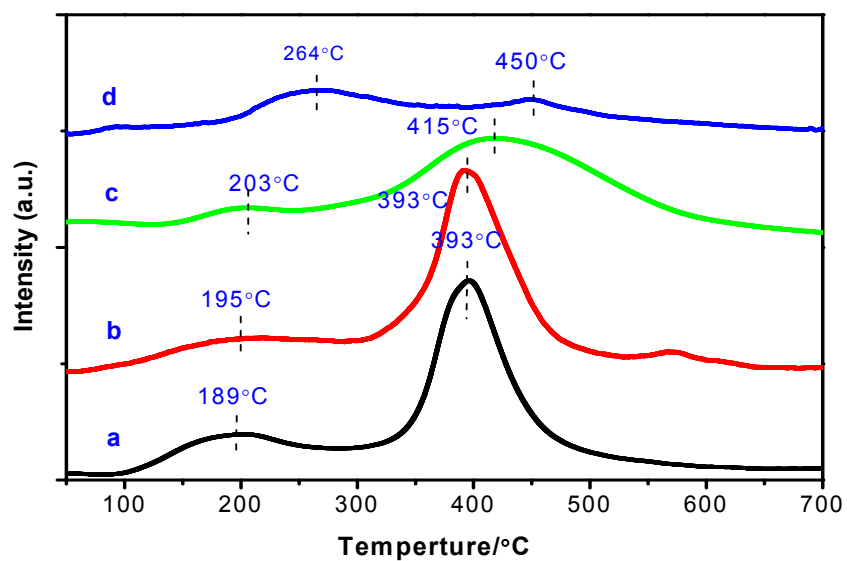

**Fig. S9** O<sub>2</sub>-TPD profiles over (a) Co<sub>3</sub>O<sub>4</sub> NTs(350°C), (b) Co<sub>3</sub>O<sub>4</sub> NTs(550°C), (c) Co<sub>3</sub>O<sub>4</sub> NRs, and (d) Co<sub>3</sub>O<sub>4</sub> NPs.

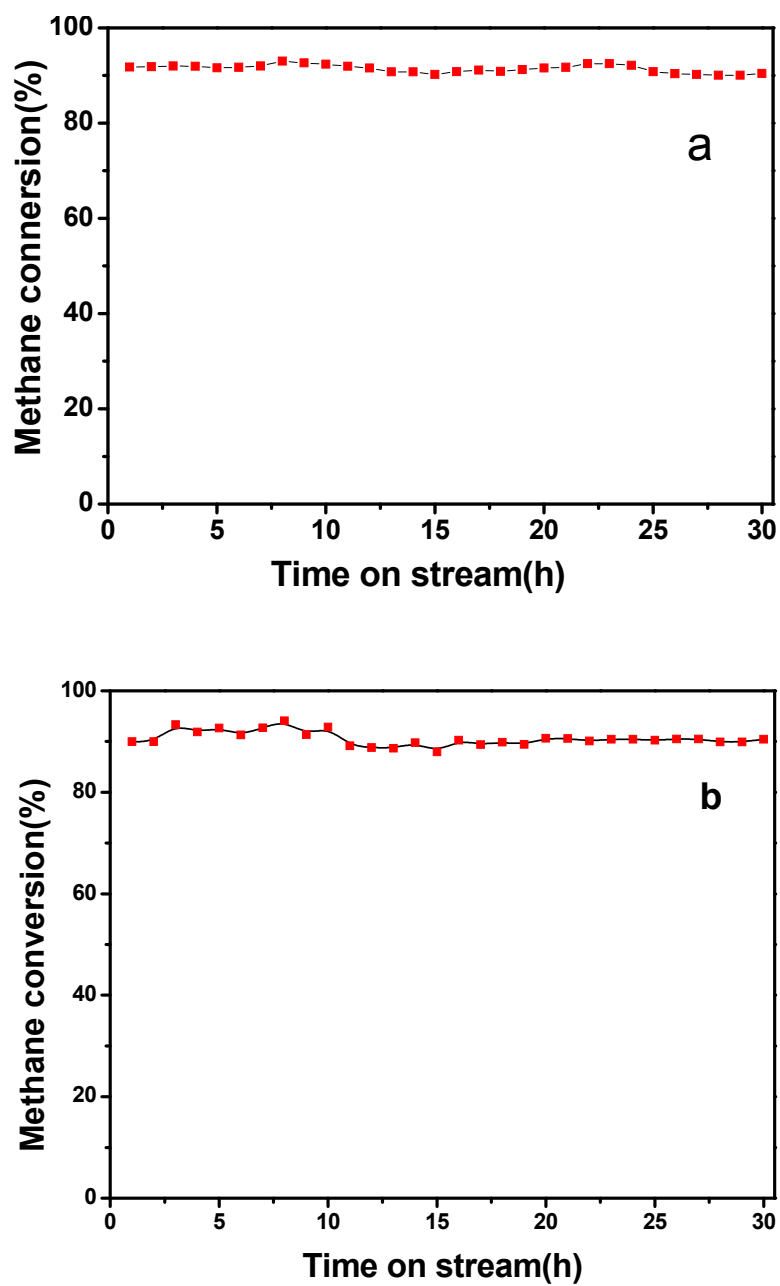

**Fig. S10** Durability test of (a) Co<sub>3</sub>O<sub>4</sub> NTs(350°C) and (b) Co<sub>3</sub>O<sub>4</sub> NTs(550°C) in catalytic methane combustion at 295 and 305°C ( $T_{90}$ ), respectively.

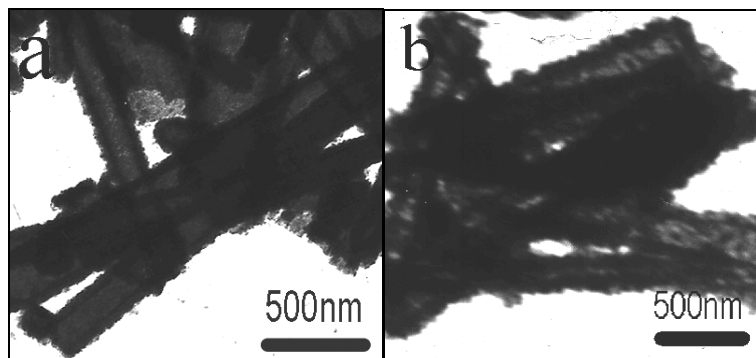

**Fig. S11** TEM images of (a)  $\text{Co}_3\text{O}_4$  NTs (350°C) and (b)  $\text{Co}_3\text{O}_4$  NTs (550°C) after 30-h reaction.
